# Supplementary material for: Exploring Genetics by Environment Interactions in Some Rice Genotypes across Varied Environmental Conditions
Source: MDPI journal article supplement (doi:10.3390/plants13010074), 2023-12-26
Supplement: s1 [file s1]

**Table S1** The monthly maximum and minimum temperature (°C) as well as relative humidity (%) at four locations during 2021 and 2022 rice seasons.

| Month     | Kafr EL-Sheikh Governorate |      |           |                |      |           | Gharbya Governorate |      |           |                |      |           | Alexandria Governorate |       |           |                |       |           | New Valley Governorate |      |           |                |      |           |
|-----------|----------------------------|------|-----------|----------------|------|-----------|---------------------|------|-----------|----------------|------|-----------|------------------------|-------|-----------|----------------|-------|-----------|------------------------|------|-----------|----------------|------|-----------|
|           | Air Temp. 2021             |      | RH % 2021 | Air Temp. 2022 |      | RH % 2022 | Air Temp. 2021      |      | RH % 2021 | Air Temp. 2022 |      | RH % 2022 | Air Temp. 2021         |       | RH % 2021 | Air Temp. 2022 |       | RH % 2022 | Air Temp. 2021         |      | RH % 2021 | Air Temp. 2022 |      | RH % 2022 |
|           | Max                        | Min  |           | Max            | Min  |           | Max                 | Min  |           | Max            | Min  |           | Max                    | Min   |           | Max            | Min   |           | Max                    | Min  |           | Max            | Min  |           |
|           |                            |      |           |                |      |           |                     |      |           |                |      |           |                        |       |           |                |       |           |                        |      |           |                |      |           |
| May       | 32.5                       | 24.8 | 49.55     | 30.0           | 21.8 | 53.85     | 37.1                | 17.9 | 46.4      | 34.1           | 16.8 | 51.3      | 28.30                  | 19.00 | 56.47     | 26.3           | 17.96 | 61.22     | 41.1                   | 23.3 | 17.04     | 37.8           | 22.3 | 20.33     |
| June      | 32.1                       | 25.5 | 51.54     | 33.0           | 25.7 | 53.04     | 36.9                | 19.8 | 50.1      | 37.8           | 21.1 | 50.8      | 28.88                  | 20.45 | 60.39     | 27.9           | 19.35 | 62.61     | 41.9                   | 24.6 | 22.44     | 40.2           | 24.7 | 23.10     |
| July      | 34.7                       | 28.0 | 52.94     | 33.4           | 25.9 | 53.53     | 39.7                | 22.8 | 51.0      | 38.9           | 22.1 | 51.1      | 29.02                  | 25.82 | 60.77     | 28.27          | 25.05 | 61.36     | 42.4                   | 25.9 | 22.08     | 40.7           | 24.1 | 22.87     |
| August    | 35.6                       | 28.3 | 55.11     | 34.4           | 25.9 | 55.52     | 40.4                | 23.5 | 52.8      | 38.6           | 23.2 | 54.0      | 31.65                  | 26.06 | 63.02     | 30.34          | 25.77 | 61.44     | 42.1                   | 25.2 | 22.70     | 41.2           | 25.5 | 25.40     |
| September | 32.5                       | 25.1 | 55.99     | 33.0           | 25.9 | 55.36     | 36.3                | 21.9 | 55.4      | 37.0           | 22.2 | 54.6      | 31.40                  | 25.95 | 61.19     | 32.22          | 26.00 | 60.50     | 38.2                   | 24.4 | 30.88     | 39.8           | 23.9 | 27.03     |

**Table S2** Physical and chemical properties of experimental field soils at four locations in the rice growing seasons.

| Characters                     | Kafr EL-Sheikh Governorate |       | Gharbya Governorate |       | Alexandria Governorate |                | New Valley Governorate |            |
|--------------------------------|----------------------------|-------|---------------------|-------|------------------------|----------------|------------------------|------------|
|                                | 2021                       | 2022  | 2021                | 2022  | 2021                   | 2022           | 2021                   | 2022       |
| <b>chemical analysis</b>       |                            |       |                     |       |                        |                |                        |            |
| PH                             | 8.00                       | 8.30  | 7.98                | 8.12  | 8.10                   | 7.98           | 7.25                   | 7.50       |
| Organic matter (%)             | 1.45                       | 1.58  | --                  | --    | 1.60                   | 1.67           | --                     | --         |
| <b>Soluble Cations, meq/l.</b> |                            |       |                     |       |                        |                |                        |            |
| Ca <sup>++</sup>               | 7.40                       | 7.20  | 2.05                | 2.70  | 8.50                   | 9.54           | 1.03                   | 0.95       |
| Mg <sup>++</sup>               | 2.85                       | 2.65  | 1.85                | 2.30  | 10.50                  | 9.35           | 1.00                   | 1.20       |
| Na <sup>+</sup>                | 13.10                      | 14.10 | 3.55                | 4.48  | 59.10                  | 58.94          | 0.98                   | 1.05       |
| K <sup>+</sup>                 | 1.03                       | 1.21  | 0.31                | 0.28  | 1.10                   | 0.93           | 0.19                   | 0.17       |
| <b>Soluble Anions, meq/l.</b>  |                            |       |                     |       |                        |                |                        |            |
| CO <sub>3</sub> <sup>--</sup>  | --                         | --    | --                  | --    | --                     | --             | --                     | --         |
| HCO <sub>3</sub> <sup>-</sup>  | 4.85                       | 5.40  | 3.03                | 4.29  | 4.00                   | 5.76           | 0.90                   | 0.88       |
| SO <sub>4</sub> <sup>--</sup>  | 7.80                       | 8.28  | 1.58                | 2.61  | 8.49                   | 10.10          | 1.49                   | 1.20       |
| Cl <sup>-</sup>                | 11.50                      | 11.75 | 2.15                | 2.86  | 74.5                   | 70.78          | 0.75                   | 1.43       |
| <b>Physical analysis</b>       |                            |       |                     |       |                        |                |                        |            |
| Sand (%)                       | 13.28                      | 13.73 | 13.61               | 12.11 | 44.20                  | 44.15          | 59.32                  | 41.98      |
| Clay (%)                       | 56.05                      | 55.55 | 49.63               | 50.69 | 29.76                  | 30.25          | 21.48                  | 32.00      |
| Silt (%)                       | 32.49                      | 30.44 | 28.31               | 30.60 | 26.10                  | 26.84          | 10.13                  | 10.58      |
| CaCO <sub>3</sub>              | 3.85                       | 3.35  | 4.05                | 3.77  | 4.85                   | 4.57           | 2.15                   | 1.75       |
| Soil texture                   | Clay                       | Clay  | Clay                | Clay  | Sand clay loam         | Sand clay loam | Loam sandy             | Clay sandy |

**Table S3** Genotypes mean performance under the eight different environments

| GEN | Kafr EL-Sheikh Governorate |         | Alexandria Governorate |        | Gharbya Governorate |         | New Valley Governorate |        | Mean   |
|-----|----------------------------|---------|------------------------|--------|---------------------|---------|------------------------|--------|--------|
|     | Env1                       | Env2    | Env3                   | Env4   | Env5                | Env6    | Env7                   | Env8   |        |
| G1  | 956.13                     | 943.21  | 244.88                 | 238.47 | 970.20              | 967.98  | 263.33                 | 247.08 | 603.91 |
| G2  | 1082.49                    | 1106.09 | 636.67                 | 654.13 | 1164.23             | 1150.00 | 864.50                 | 834.00 | 936.51 |
| G3  | 1117.28                    | 1173.48 | 690.40                 | 692.50 | 1198.76             | 1209.91 | 766.50                 | 746.83 | 949.46 |
| G4  | 1080.37                    | 1103.34 | 438.67                 | 423.78 | 1102.34             | 1052.19 | 478.00                 | 496.58 | 771.91 |
| G5  | 1010.26                    | 1026.16 | 349.51                 | 354.96 | 1040.65             | 1058.25 | 440.68                 | 433.92 | 714.30 |
| G6  | 1036.95                    | 1072.50 | 498.55                 | 512.11 | 1122.37             | 1123.80 | 540.33                 | 539.58 | 805.78 |
| G7  | 1017.43                    | 1026.65 | 401.47                 | 400.60 | 1003.77             | 1025.50 | 420.28                 | 410.67 | 713.30 |
| G8  | 1008.38                    | 1046.45 | 395.80                 | 397.18 | 1043.09             | 1049.54 | 422.50                 | 432.50 | 724.43 |
| G9  | 1036.45                    | 1039.94 | 485.59                 | 487.47 | 1132.82             | 1103.17 | 688.25                 | 698.08 | 833.97 |
| G10 | 1087.34                    | 1100.60 | 464.03                 | 456.60 | 1172.00             | 1173.89 | 488.17                 | 477.25 | 802.48 |
| G11 | 1103.74                    | 1140.28 | 502.64                 | 496.65 | 1193.71             | 1154.55 | 512.68                 | 527.68 | 828.99 |
| G12 | 919.42                     | 942.61  | 700.58                 | 683.86 | 872.67              | 871.55  | 688.42                 | 643.58 | 790.34 |
| G13 | 914.32                     | 940.11  | 515.37                 | 515.59 | 956.26              | 982.87  | 677.25                 | 681.58 | 772.92 |
| G14 | 821.68                     | 841.54  | 423.53                 | 414.99 | 889.79              | 893.23  | 585.75                 | 583.75 | 681.78 |
| G15 | 1035.00                    | 1052.96 | 690.68                 | 677.47 | 1023.89             | 1028.85 | 905.67                 | 893.75 | 913.53 |
| G16 | 905.47                     | 903.30  | 511.88                 | 510.64 | 999.79              | 981.91  | 629.33                 | 615.68 | 757.25 |
| G17 | 806.39                     | 829.56  | 401.91                 | 407.13 | 858.99              | 864.18  | 485.83                 | 503.85 | 644.73 |
| G18 | 1001.77                    | 1002.62 | 776.58                 | 779.73 | 989.08              | 994.21  | 717.31                 | 710.89 | 871.52 |
| G19 | 801.32                     | 803.29  | 595.87                 | 597.04 | 873.99              | 878.17  | 742.25                 | 767.93 | 757.48 |
| G20 | 800.93                     | 800.49  | 459.81                 | 469.33 | 844.84              | 866.52  | 606.17                 | 593.83 | 680.24 |
| G21 | 977.03                     | 987.55  | 600.93                 | 600.04 | 955.20              | 947.51  | 922.33                 | 899.15 | 861.22 |
| G22 | 1005.99                    | 1057.55 | 606.55                 | 592.30 | 1062.83             | 1091.11 | 802.42                 | 783.27 | 875.25 |
| G23 | 814.95                     | 815.60  | 537.14                 | 553.35 | 883.60              | 870.86  | 646.43                 | 621.94 | 717.98 |
| G24 | 1008.46                    | 1027.03 | 583.62                 | 585.37 | 1069.51             | 1070.58 | 754.67                 | 753.00 | 856.53 |
| G25 | 908.32                     | 914.34  | 560.36                 | 558.69 | 924.56              | 930.94  | 637.83                 | 659.54 | 761.82 |
| G26 | 801.91                     | 814.18  | 500.42                 | 500.08 | 793.66              | 851.56  | 647.05                 | 659.00 | 695.98 |
| G27 | 1017.16                    | 1031.17 | 601.76                 | 595.53 | 1043.27             | 1078.26 | 758.58                 | 730.00 | 856.97 |
| G28 | 1015.52                    | 1020.59 | 585.40                 | 580.56 | 1034.80             | 1024.20 | 729.75                 | 767.08 | 844.74 |
| G29 | 1016.34                    | 1044.40 | 484.09                 | 489.32 | 966.85              | 978.82  | 532.83                 | 548.17 | 757.60 |
| G30 | 796.15                     | 804.46  | 598.68                 | 600.40 | 860.13              | 873.80  | 748.37                 | 753.08 | 754.38 |
| G31 | 735.50                     | 745.76  | 494.01                 | 493.27 | 770.16              | 733.51  | 592.92                 | 651.67 | 652.10 |
| G32 | 808.17                     | 817.21  | 295.46                 | 298.43 | 776.90              | 791.47  | 327.67                 | 326.68 | 555.25 |
| G33 | 893.87                     | 896.98  | 594.84                 | 597.45 | 965.19              | 966.85  | 769.33                 | 777.92 | 807.80 |
| G34 | 826.65                     | 821.27  | 653.17                 | 653.38 | 872.50              | 894.20  | 765.09                 | 750.92 | 779.65 |

**Table S4** Genotypes and environments overall mean performance and their PC1.

| Entry | Name              | PC1   |
|-------|-------------------|-------|
| G1    | Giza 177          | -12.5 |
| G2    | Giza 178          | 0.9   |
| G3    | Giza 179          | -2.6  |
| G4    | Sakha 101         | -9.1  |
| G5    | Sakha 102         | -9.4  |
| G6    | Sakha 104         | -7.0  |
| G7    | Sakha 105         | -8.8  |
| G8    | Sakha 106         | -9.2  |
| G9    | Sakha 107         | -3.1  |
| G10   | Sakha 108         | -10.6 |
| G11   | Sakha Super 300   | -9.8  |
| G12   | IRAT 170          | 5.4   |
| G13   | A22               | 1.6   |
| G14   | Nerica 9          | 1.3   |
| G15   | IET 1444          | 5.9   |
| G16   | Nerica 7          | 0.3   |
| G17   | Moroberekan       | -0.2  |
| G18   | GZ 1368           | 4.0   |
| G19   | Azucena           | 8.5   |
| G20   | IRAT 112          | 3.5   |
| G21   | N22               | 7.6   |
| G22   | IR65600-77        | 1.5   |
| G23   | IR69116           | 4.7   |
| G24   | IR12G3213         | 0.8   |
| G25   | IR69432           | 2.5   |
| G26   | IR6500-127        | 5.7   |
| G27   | IR11L236          | 0.8   |
| G28   | IR12G3222         | 1.4   |
| G29   | Sakha 109         | -4.1  |
| G30   | Vandana           | 12.0  |
| G31   | Dular             | 7.4   |
| G32   | Sakha 103         | -4.1  |
| G33   | Giza 181          | 5.6   |
| G34   | Giza 182          | 9.0   |
| E1    | Kafrelsheikh-2021 | -13.0 |
| E2    | Kafrelsheikh-2022 | -13.7 |
| E3    | Alexandria-2021   | 8.8   |
| E4    | Alexandria-2022   | 8.9   |
| E5    | Gharbya-2021      | -12.9 |
| E6    | Gharbya-2022      | -12.2 |
| E7    | New Valley-2021   | 16.9  |
| E8    | New Valley-2022   | 17.1  |

**Table S5** Genotypes rankings based on yield performance and several stability indices.

| GEN                    | Y_R | Shukla_R | Wi_g_R | Wi_f_R | Wi_u_R | Ecoval_R | Sij_R | Pi_a_R | Pi_f_R | Pi_u_R | Gai_R | S1_R | S2_R | S3_R | S6_R | N1_R |
|------------------------|-----|----------|--------|--------|--------|----------|-------|--------|--------|--------|-------|------|------|------|------|------|
| <b>Giza 177</b>        | 33  | 34       | 34     | 17     | 34     | 34       | 33    | 33     | 19     | 34     | 34    | 4    | 34   | 31   | 34   | 34   |
| <b>Giza 178</b>        | 2   | 10       | 2      | 3      | 3      | 10       | 18    | 1      | 4      | 2      | 2     | 33   | 9    | 1    | 1    | 7.5  |
| <b>Giza 179</b>        | 1   | 9        | 1      | 1      | 4      | 9        | 9     | 2      | 1      | 3      | 1     | 4    | 10.5 | 8    | 4    | 11   |
| <b>Sakha 101</b>       | 18  | 29       | 29     | 7      | 28     | 29       | 27    | 23     | 7      | 28     | 24    | 20.5 | 29   | 28   | 26   | 29   |
| <b>Sakha 102</b>       | 26  | 31       | 32     | 9      | 30     | 31       | 15    | 30     | 12     | 32     | 31    | 12   | 30   | 30   | 31   | 30   |
| <b>Sakha 104</b>       | 13  | 20       | 18     | 5      | 24     | 20       | 23    | 14     | 5      | 23     | 15    | 4    | 17   | 21   | 18   | 19   |
| <b>Sakha 105</b>       | 27  | 25       | 31     | 15     | 32     | 25       | 32    | 29     | 15     | 31     | 29    | 26.5 | 22   | 29   | 30   | 24   |
| <b>Sakha 106</b>       | 24  | 28       | 30     | 12     | 31     | 28       | 28    | 26     | 11     | 30     | 27    | 12   | 25   | 32   | 32   | 25   |
| <b>Sakha 107</b>       | 10  | 15       | 10     | 6      | 22     | 15       | 13    | 10     | 6      | 18     | 11    | 20.5 | 15   | 16   | 14   | 16   |
| <b>Sakha 108</b>       | 14  | 33       | 28     | 4      | 29     | 33       | 31    | 20     | 3      | 27     | 21    | 12   | 32   | 33   | 25   | 32   |
| <b>Sakha Super 300</b> | 11  | 32       | 22     | 2      | 25     | 32       | 30    | 15     | 2      | 25     | 14    | 20.5 | 27   | 24   | 21   | 27   |
| <b>IRAT 170</b>        | 15  | 22       | 21     | 26     | 18     | 22       | 21    | 12     | 24     | 14     | 12    | 31.5 | 24   | 23   | 20   | 18   |
| <b>A22</b>             | 17  | 7        | 9      | 18     | 17     | 7        | 8     | 13     | 20     | 16     | 17    | 20.5 | 4    | 5    | 7    | 5    |
| <b>Nerica 9</b>        | 29  | 5        | 19     | 24     | 27     | 5        | 10    | 27     | 25     | 26     | 28    | 4    | 2    | 7    | 10   | 3.5  |
| <b>IET 1444</b>        | 3   | 19       | 7      | 14     | 1      | 19       | 29    | 3      | 13     | 1      | 3     | 20.5 | 19   | 11   | 9    | 20.5 |
| <b>Nerica 7</b>        | 22  | 3        | 8      | 22     | 16     | 3        | 5     | 18     | 21     | 20     | 20    | 12   | 7    | 9    | 8    | 7.5  |
| <b>Moroberekan</b>     | 32  | 1        | 26     | 25     | 26     | 1        | 1     | 32     | 28     | 29     | 32    | 26.5 | 5    | 6    | 11   | 3.5  |
| <b>GZ 1368</b>         | 5   | 21       | 13     | 16     | 15     | 21       | 26    | 7      | 16     | 5      | 4     | 12   | 20   | 14   | 13   | 15   |
| <b>Azucena</b>         | 21  | 24       | 24     | 31     | 7      | 24       | 25    | 19     | 29     | 10     | 16    | 26.5 | 28   | 27   | 27   | 28   |
| <b>IRAT 112</b>        | 30  | 12       | 16     | 29     | 21     | 12       | 6     | 28     | 31     | 22     | 26    | 20.5 | 14   | 18   | 23   | 14   |
| <b>N22</b>             | 6   | 26       | 14     | 20     | 12     | 26       | 34    | 9      | 18     | 4      | 6     | 4    | 23   | 20   | 16   | 20.5 |
| <b>IR65600-77</b>      | 4   | 8        | 5      | 10     | 9      | 8        | 17    | 4      | 8      | 7      | 5     | 12   | 8    | 10   | 6    | 9    |
| <b>IR69116</b>         | 25  | 16       | 17     | 28     | 14     | 16       | 3     | 24     | 27     | 17     | 23    | 29.5 | 16   | 17   | 19   | 17   |
| <b>IR12G3213</b>       | 8   | 4        | 4      | 8      | 10     | 4        | 7     | 6      | 9      | 12     | 8     | 12   | 3    | 3    | 5    | 2    |
| <b>IR69432</b>         | 19  | 11       | 11     | 21     | 13     | 11       | 2     | 17     | 23     | 15     | 19    | 29.5 | 10.5 | 12   | 12   | 10   |

|                   |    |    |    |    |    |    |    |    |    |    |    |      |    |    |    |    |
|-------------------|----|----|----|----|----|----|----|----|----|----|----|------|----|----|----|----|
| <b>IR6500-127</b> | 28 | 18 | 20 | 32 | 19 | 18 | 16 | 25 | 32 | 19 | 25 | 12   | 21 | 22 | 28 | 23 |
| <b>IR11L236</b>   | 7  | 2  | 3  | 11 | 6  | 2  | 4  | 5  | 10 | 11 | 7  | 26.5 | 1  | 2  | 2  | 1  |
| <b>IR12G3222</b>  | 9  | 6  | 6  | 13 | 11 | 6  | 11 | 8  | 14 | 13 | 9  | 34   | 6  | 4  | 3  | 6  |
| <b>Sakha 109</b>  | 20 | 14 | 15 | 19 | 23 | 14 | 24 | 21 | 17 | 24 | 22 | 4    | 13 | 15 | 15 | 13 |
| <b>Vandana</b>    | 23 | 27 | 25 | 30 | 5  | 27 | 19 | 22 | 30 | 9  | 18 | 20.5 | 31 | 34 | 29 | 31 |
| <b>Dular</b>      | 31 | 23 | 27 | 34 | 20 | 23 | 14 | 31 | 34 | 21 | 30 | 31.5 | 26 | 26 | 33 | 26 |
| <b>Sakha 103</b>  | 34 | 13 | 33 | 33 | 33 | 13 | 22 | 34 | 33 | 33 | 33 | 4    | 12 | 13 | 24 | 12 |
| <b>Giza 181</b>   | 12 | 17 | 12 | 23 | 8  | 17 | 20 | 11 | 22 | 8  | 10 | 12   | 18 | 19 | 17 | 22 |
| <b>Giza 182</b>   | 16 | 30 | 23 | 27 | 2  | 30 | 12 | 16 | 26 | 6  | 13 | 20.5 | 33 | 25 | 22 | 33 |

---

**Table S6:** Favorable and unfavorable classification of the environments

| ENV | Y        | index    | class       |
|-----|----------|----------|-------------|
| E1  | 946.1507 | 171.6767 | favorable   |
| E2  | 961.5667 | 187.0927 | favorable   |
| E3  | 525.907  | -248.567 | unfavorable |
| E4  | 525.5417 | -248.932 | unfavorable |
| E5  | 983.306  | 208.832  | favorable   |
| E6  | 986.2924 | 211.8184 | favorable   |
| E7  | 634.0729 | -140.401 | unfavorable |
| E8  | 632.9546 | -141.519 | unfavorable |
